# Supplementary material for: Detection of CpG methylation level using methyl-CpG-binding domain-fused fluorescent protein
Source: Royal Society of Chemistry journal article supplement (doi:10.1039/d3ay00227f), 2023-01-01
Supplement: d3ay00227f1.pdf [file d3ay00227f1.pdf]

## Electronic Supplementary Information

### **Detection of CpG methylation level using methyl-CpG-binding domain fused green fluorescent protein**

Marika Fujita<sup>a,‡</sup> Masanori Goto<sup>a,‡</sup> Masayoshi Tanaka<sup>b</sup>, and Wataru Yoshida<sup>\*a,c</sup>

a. Graduate School of Bionics, Tokyo University of Technology, 1404-1 Katakuramachi, Hachioji, Tokyo, 192-0982, Japan. Email: yoshidawtr@stf.teu.ac.jp

b. Department of Chemical Science and Engineering, Tokyo Institute of Technology, 4259 Nagatsuta-cho, Midori-ku, Yokohama, Kanagawa, 226-8503, Japan.

c. School of Bioscience and Biotechnology, Tokyo University of Technology, 1404-1 Katakuramachi, Hachioji, Tokyo, 192-0982, Japan

‡ Equal contributions.

**Table S1 Oligonucleotides sequences used in this study.**

| Name                                   | Sequence (5'-3')                        | Length (mer) |
|----------------------------------------|-----------------------------------------|--------------|
| Forward primer for AcGFP1              | ACTGAATTCATGGTGAGCAAGGGCG               | 25           |
| Reverse primer for AcGFP1              | ACTGCGGCCGCTCACTTGTA                    | 20           |
| Methylated top strand                  | Biotin-AAAAAACAGGATXGAGCAGCTACCCT       | 26           |
| Methylated bottom strand               | AGGGTAGCTGCTXGATCCTG                    | 20           |
| Unmethylated top strand                | Biotin-AAAAAACAGGATCGAGCAGCTACCCT       | 26           |
| Unmethylated bottom strand             | AGGGTAGCTGCTCGATCCTG                    | 20           |
| Methylated <i>SEPT9</i> probe DNA      | Biotin-AAAAAATTGACXGXGGGGTCXGACATGATGGC | 32           |
| Methylated <i>SEPT9</i> target ssDNA   | GCCATCATGTXGGACCCXGXGGTCAA              | 26           |
| Unmethylated <i>SEPT9</i> target ssDNA | GCCATCATGTCTGGACCCCGGGTCAA              | 26           |
| Methylated <i>BRCA1</i> probe DNA      | Biotin-AAAAAACCCXGGATGAXGTAAAAGGAAAGAG  | 32           |
| Methylated <i>BRCA1</i> target ssDNA   | CTCTTCCTTTTAXGTCATCXGGGGG               | 26           |
| Unmethylated <i>BRCA1</i> target ssDNA | CTCTTCCTTTTACGTCATCCGGGGG               | 26           |
| Methylated LINE-1 probe DNA            | Biotin-AAAAACAATATTXGGGTGGGAGTGA        | 26           |
| Methylated LINE-1 target ssDNA         | TCACTCCCACCCXGAATATTG                   | 20           |
| Unmethylated LINE-1 target ssDNA       | TCACTCCCACCCGAATATTG                    | 20           |

**X: 5-methylcytosine**

ATGTGGAGCCATCCGCAGTTTGAAAAGGCTGAGGACTGGCTGGACTGCCCGGCCCTGGGCCCTGGCTGGAAGCGCCG  
CGAAGTCTTTCGCAAGTCAGGGGCCACCTGTGGACGCTCAGACACCTATTACCAGAGCCCCACAGGAGACAGGATCC  
GAAGCAAAGTTGAGCTGACTCGATACCTGGGCCCTGCGTGTGATCTCACCTCTTCGACTTCAAACAAGGCATCTTG  
TGCTATCCAGCCCCAAGGCCATCCCCTGGCGGTTGCCAGCGAATTCAGACCAATGGTGAGCAAGGGCGCCGAGCT  
GTTACCCGGCATCGTGCCATCCTGATCGAGCTGAATGGCGATGTGAATGGCCACAAGTTCAGCGTGAGCGGCGAGG  
GCGAGGGCGATGCCACCTACGGCAAGCTGACCCTGAAGTTCATCTGCACCACCGCAAGCTGCCTGTGCCCTGGCCC  
ACCCTGGTGACCACCTGAGCTACGGCGTGCAGTGCTTCTCACGCTACCCGATCACATGAAGCAGCAGCACTTCTT  
CAAGAGCGCCATGCCTGAGGGCTACATCCAGGAGCGCACCATCTTCTTCGAGGATGACGGCAACTACAAGTCGCGCG  
CCGAGGTGAAGTTCGAGGGCGATACCCTGGTGAATCGCATCGAGCTGACCGGCACCGATTTCAAGGAGGATGGCAAC  
ATCCTGGGCAATAAGATGGAGTACAAC TACAACGCCCAACAATGTGTACATCATGACCGACAAGGCCAAGAATGGCAT  
CAAGGTGAACTTCAAGATCCGCCACAACATCGAGGATGGCAGCGTGCAGCTGGCCGACCACTACCAGCAGAATACCC  
CCATCGGCGATGGCCCTGTGCTGCTGCCGATAACCACTACCTGTCCACCCAGAGCGCCCTGTCCAAGGACCCCAAC  
GAGAAGCGCGATCACATGATCTACTTCGGCTTCGTGACCGCCGCCATCACCCACGGCATGGATGAGCTGTACAA  
GTGA

**Fig. S1 DNA sequence of *Strep-tag II-MBD-AcGFP1*.**

The DNA sequence of *Strep-tag II*, *MBD*, and *AcGFP1* are shown as orange, blue, and red, respectively.

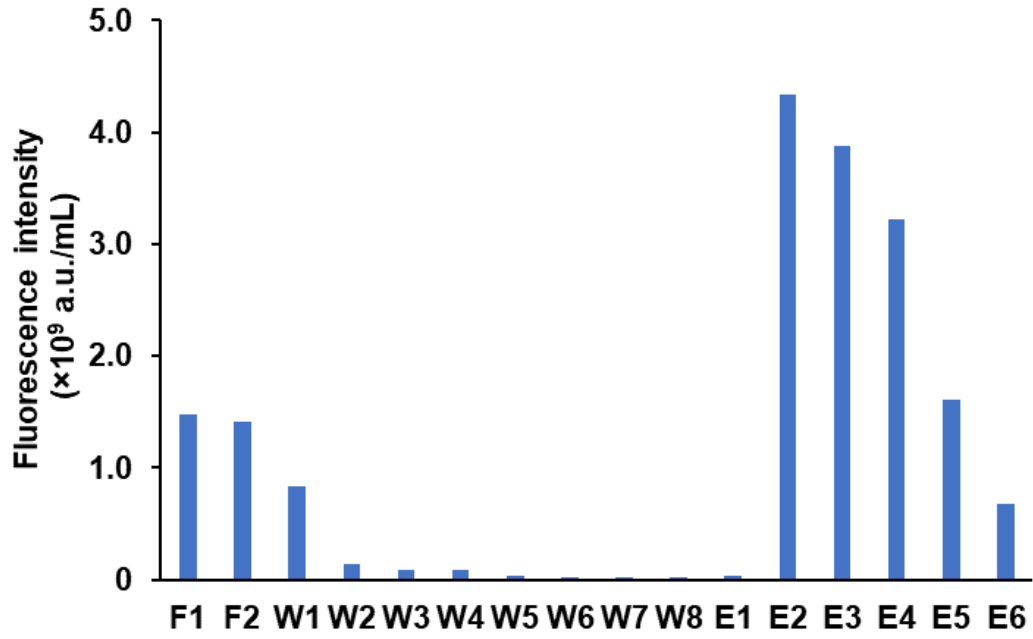

**Fig. S2 Fluorescence intensity of each fraction in the purification of MBD-AcGFP1.**

The fluorescence intensity of flow-through fractions (F1-F2), wash fractions (W1-W8), and elution fractions (E1-E6) were measured using 5  $\mu$ L of samples with 45  $\mu$ L of 1 $\times$  PBS.

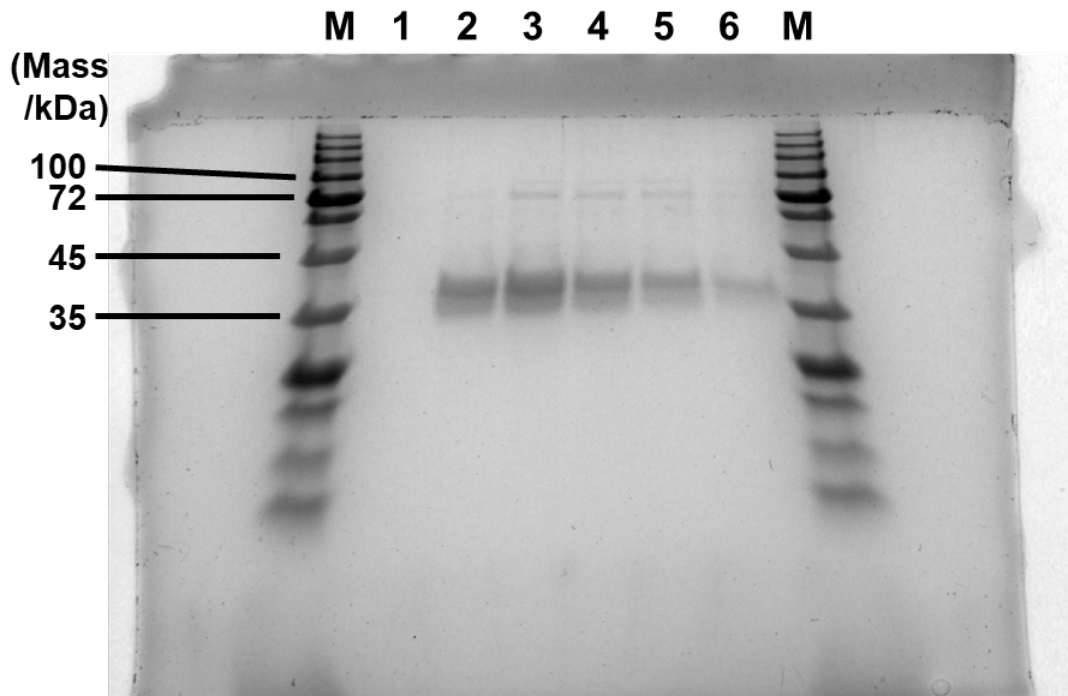

**Fig. S3 SDS-PAGE analysis of the elution fractions.**

The elution fractions (1-6) were analyzed using 12% SDS-PAGE. Molecular weight of MBD-AcGFP1 is  $3.8 \times 10^4$ .

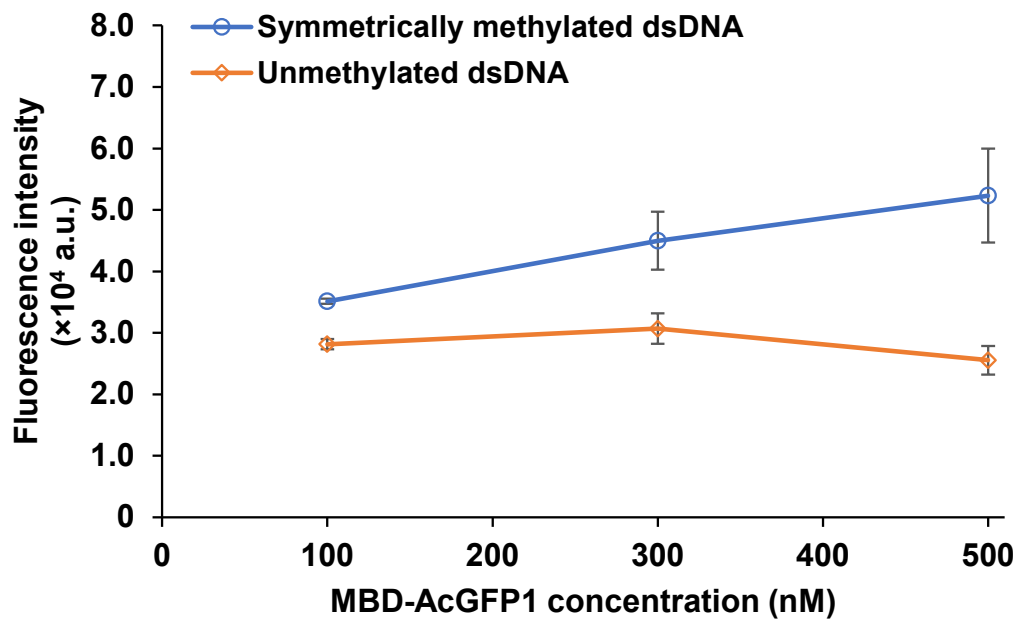

**Fig. S4 Optimization of the concentration of the MBD-AcGFP1.**

The methylated top strand and unmethylated top strand were mixed with the methylated bottom strand and unmethylated bottom strand at 1.25  $\mu$ M in a binding buffer (1 $\times$  PBS with 2 mM MgCl<sub>2</sub>) to prepare symmetrically methylated and unmethylated dsDNA, respectively. The dsDNA (125 pmol) was immobilized on the streptavidin-coated wells, and MBD-AcGFP1 (100, 300, or 500 nM) was added. The fluorescence intensity of the bound MBD-AcGFP1 was measured ( $n = 3$ , mean  $\pm$  SD).

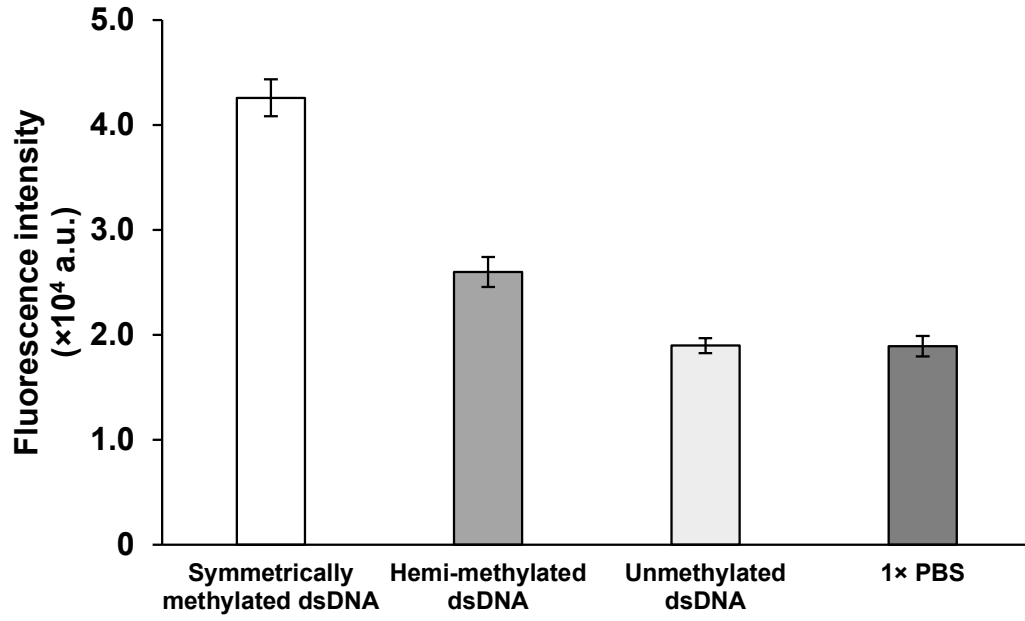

**Fig. S5 Raw fluorescence intensity of the binding assay of MBD-AcGFP1 against symmetrically, hemi-, and unmethylated dsDNA.**

Fluorescence intensity of 1x PBS in the streptavidin-coated well, which contains neither any DNA nor MBD-AcGFP1 was measured as the background intensity.

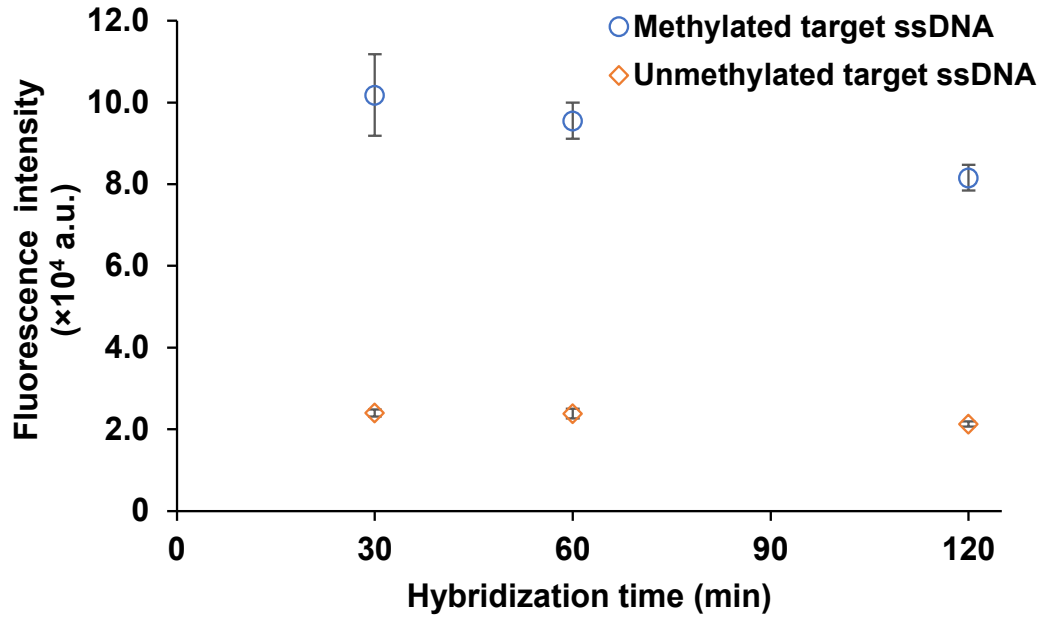

**Fig. S6 Optimization of the hybridization time of the methylated *SEPT9* target ssDNA to the probe DNA.**

Methylated *SEPT9* probe DNA (125 pmol) was immobilized onto streptavidin-coated wells. The *SEPT9* methylated or unmethylated target ssDNA (125 pmol) was added to the well and incubated at 25°C for 30, 60, or 120 min. After washing the wells, 500 nM MBD-AcGFP1 was added and incubated at 25°C for 30 min. After washing the wells, fluorescence intensity of the bound MBD-AcGFP1 was measured ( $n = 4$ , mean  $\pm$  SD).



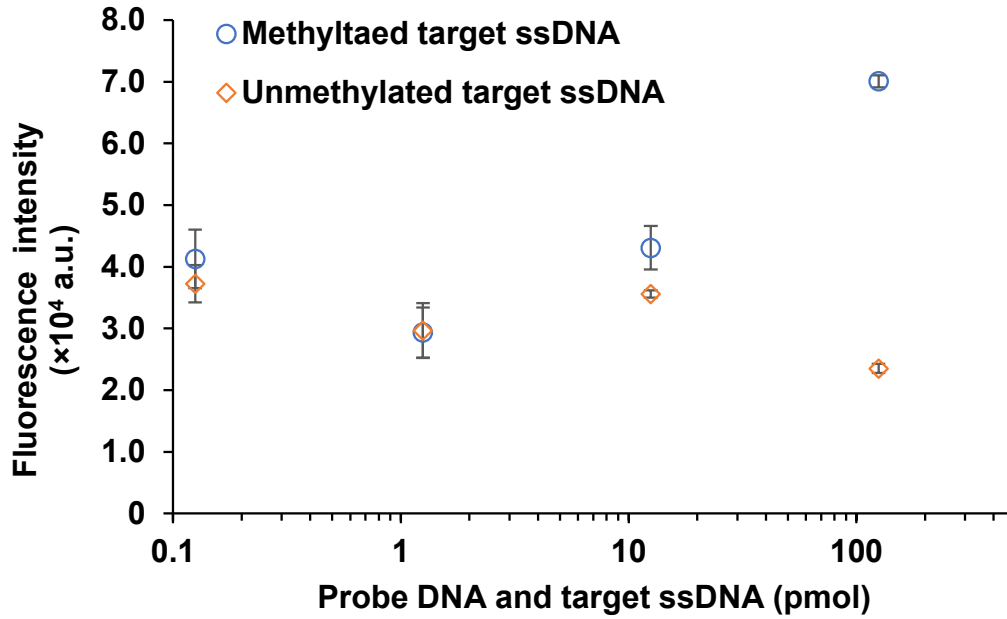

**Fig. S7 Optimization of the amount of the methylated *SEPT9* probe DNA and target ssDNA.**

Methylated *SEPT9* probe DNA (0.125, 1.25, 12.5, or 125 pmol) was immobilized onto streptavidin-coated wells. The *SEPT9* methylated target ssDNA (0.125, 1.25, 12.5, or 125 pmol) was added to the 0.125–125 pmol of corresponding methylated *SEPT9* probe DNA-immobilized wells and incubated at 25°C for 30 min. After washing the wells, 500 nM MBD-AcGFP1 was added and incubated at 25°C for 30 min. After washing the wells, fluorescence intensity of the bound MBD-AcGFP1 was measured ( $n = 4$ , mean  $\pm$  SD).
